# Supplementary material
Source: MDPI journal article supplement (https://www.mdpi.com/2073-4433/12/4/489)
Supplement: s1 [file s1]

## Supplementary Materials:

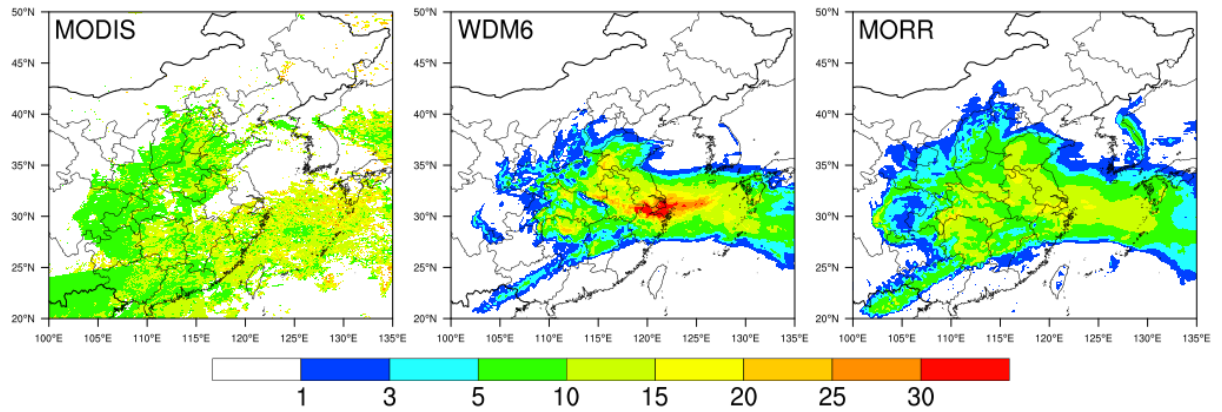

**Figure S1.** Averaged  $R_c$  ( $\mu\text{m}$ ) from 5 to 7 January 2017 (Left: MODIS data; Mid: WDM6 Scheme; Right: Morrison Scheme).

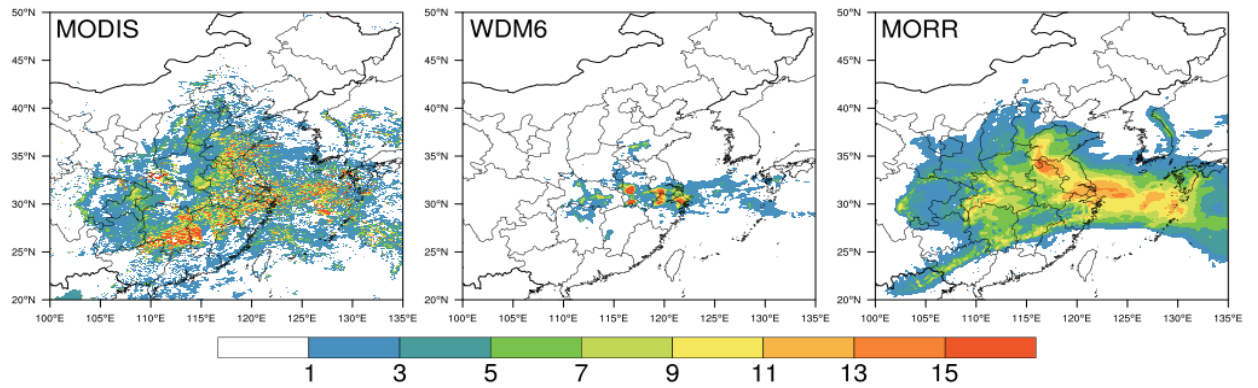

**Figure S2.** Averaged COD from 5 to 7 January 2017 (Left: MODIS data; Mid: WDM6 Scheme; Right: Morrison Scheme)

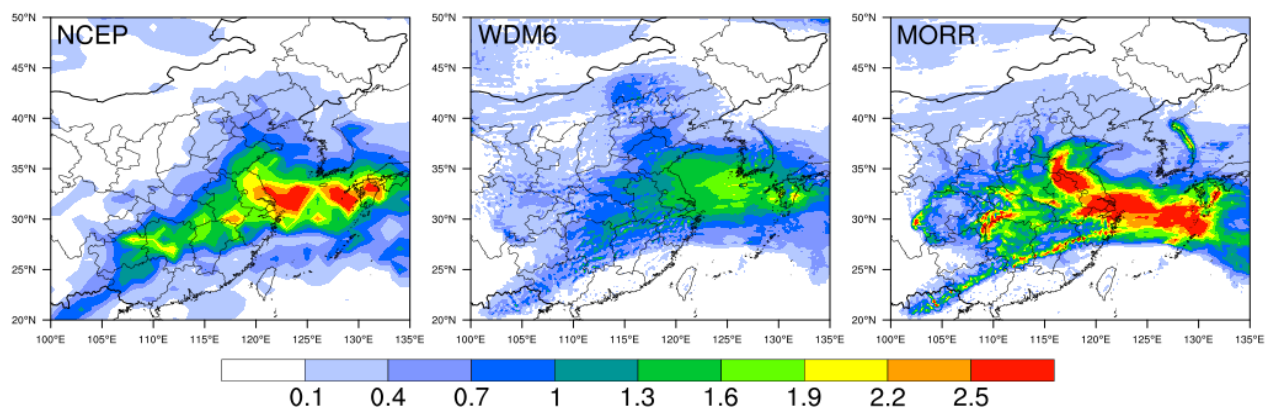

**Figure S3.** Averaged CLWP ( $\text{g m}^{-2}$ ) from 5 to 7 January 2017 (Left: NCEP data; Mid: WDM6 Scheme; Right: Morrison Scheme)

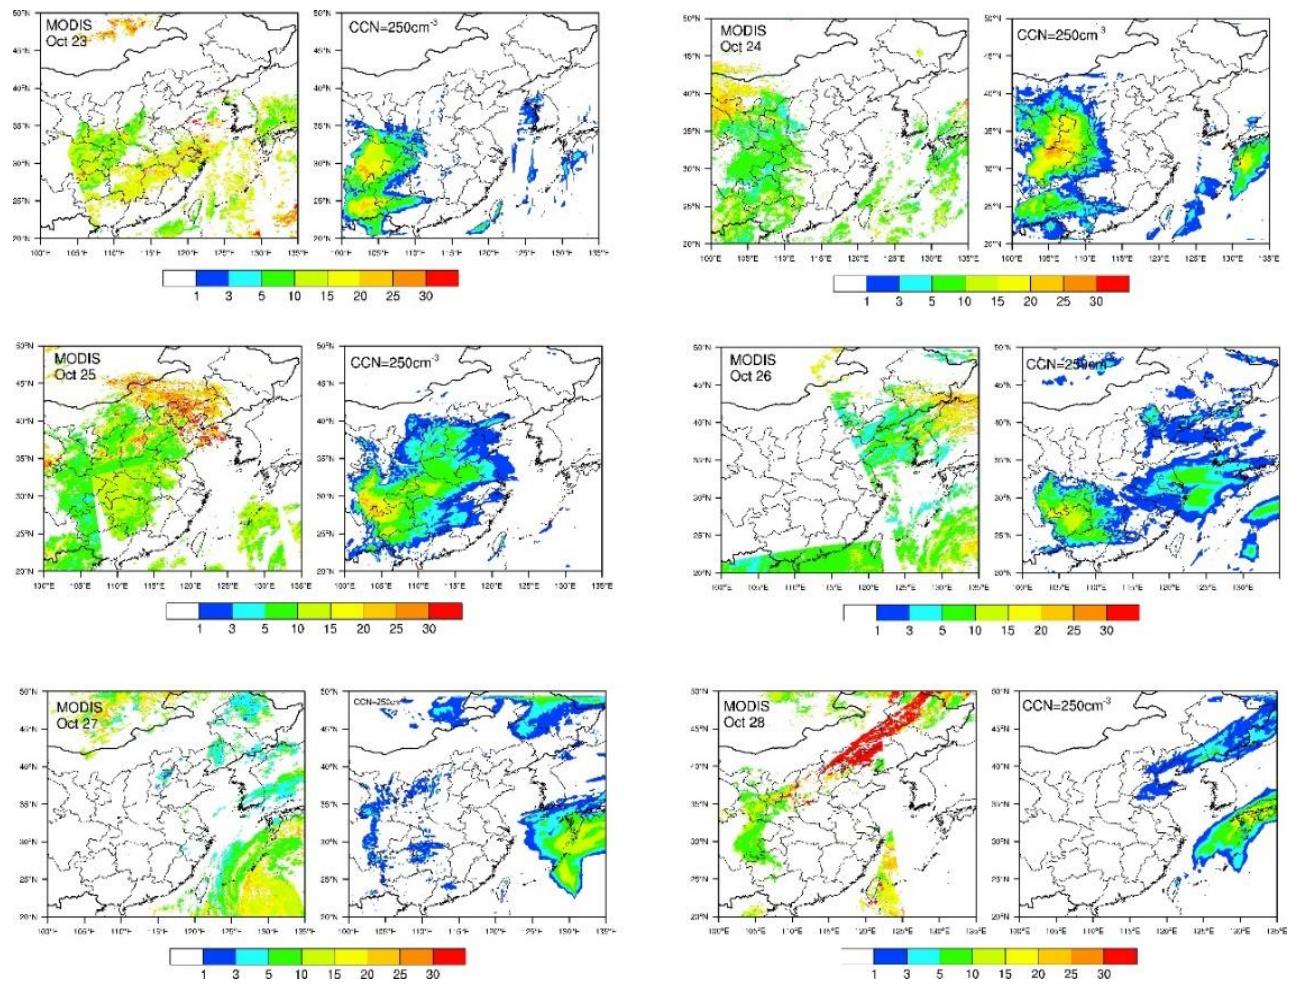

**Figure S4.** Comparison between MODIS and CCN=250cm<sup>-3</sup> Rc from 23 to 28 October 2017

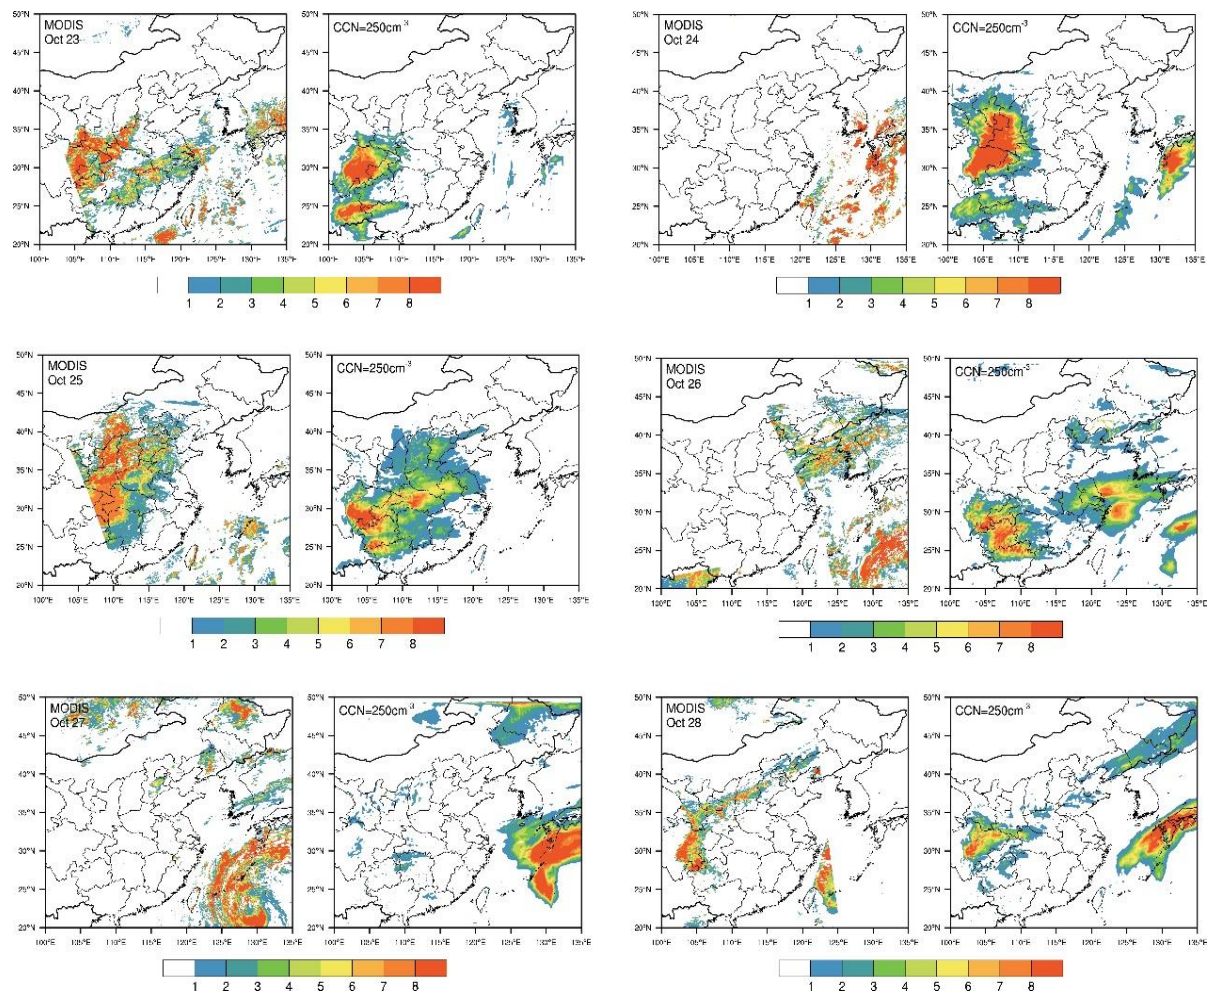

**Figure S5.** Comparison between MODIS and CCN=250cm<sup>-3</sup> COD from 23 to 28 October 2017



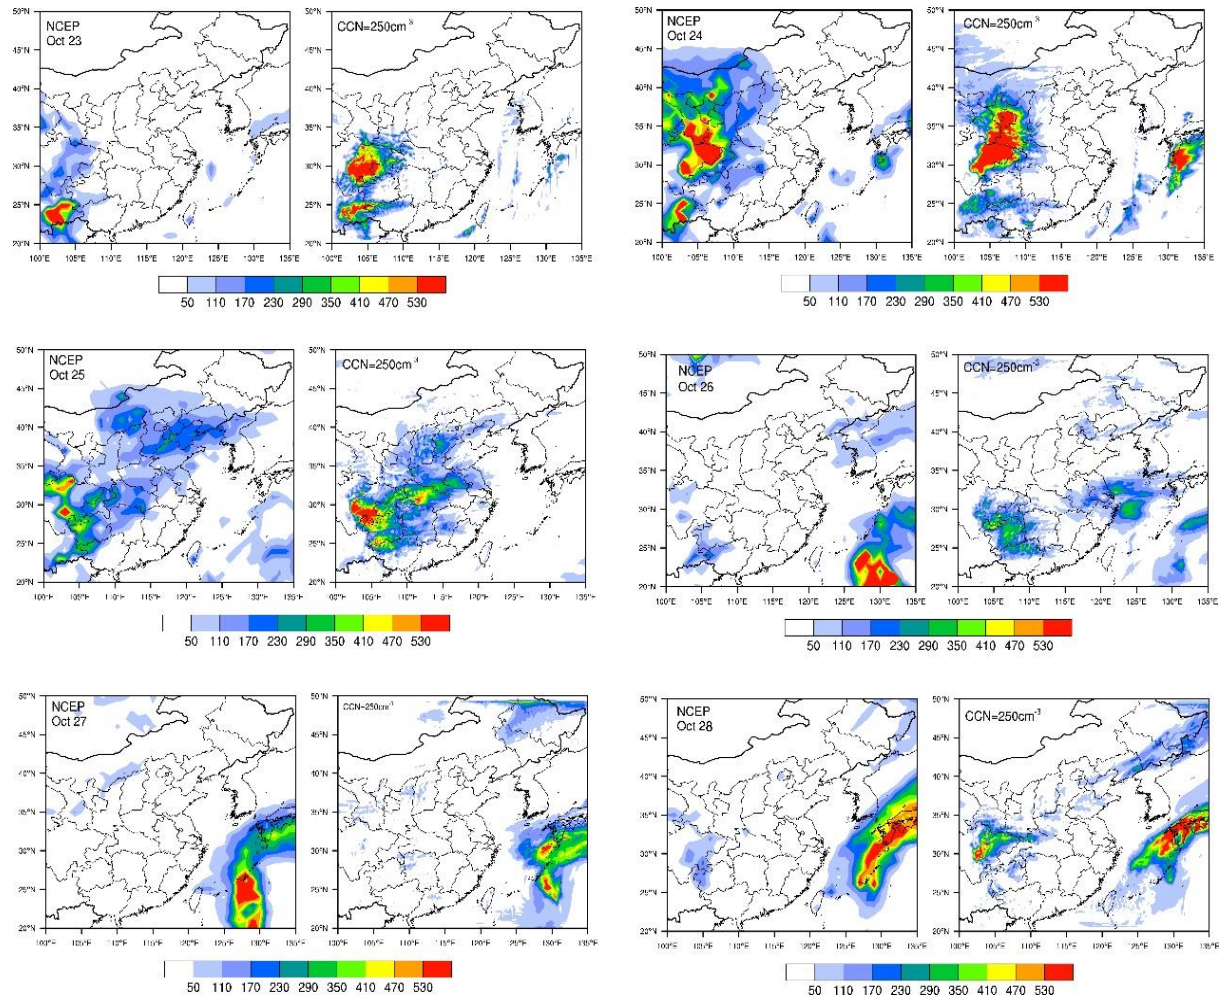

**Figure S6.** Comparison between NCEP and CCN=250cm<sup>-3</sup> CLWP from 23 to 28 October 2017

**Table S1.** Comparison of observed and average Rc, COD and CLWP with CCN values of 250cm<sup>-3</sup> simulated by Morrison and WDM6 scheme from 5 to 7 January 2017

|                           | Morrison |      | WDM6 |       |
|---------------------------|----------|------|------|-------|
|                           | CORR     | RMSE | CORR | RMSE  |
| Rc (μm)                   | 0.55     | 8.6  | 0.31 | -12.2 |
| COD                       | 0.59     | -3.3 | 0.15 | 10.7  |
| CLWP (kg/m <sup>2</sup> ) | 0.52     | -0.8 | 0.24 | 1.9   |
